# Supplementary material
Source: Springer Nature journal article supplement (https://www.springermedizin.de/resource/supplementary/12889_2010_2863_MOESM4_ESM.pdf/9487484)
Supplement: MOESM4 [file 9487484]

Identification

Records identified through  
database searching (n = 5147)

Additional records identified  
through other sources  
(n = 11)

Screening

Records after duplicates removed  
(n = 3867)

Records screened  
(n = 3867)

Records excluded  
(n = 3762)

Eligibility

107 full-text articles  
assessed for eligibility

Articles excluded (n = 77)  
- Not systematic review (36)  
- OQAQ score <14 (33)  
- Not in English (1)  
- Wrong population (2)  
- Aims not relevant (3)  
- Inappropriate outcomes (2)

Included

Reviews included in  
qualitative synthesis  
(n = 30)
